# Supplementary material for: Novel epigenetic clock for fetal brain development predicts prenatal age for cellular stem cell models and derived neurons
Source: PubMed Central journal article supplement (PMC8236187; doi:10.1186/s13041-021-00810-w), 2021-06-26
Supplement: 13041_2021_810_MOESM5_ESM.pdf [file 13041_2021_810_MOESM5_ESM.pdf]

**A FBC**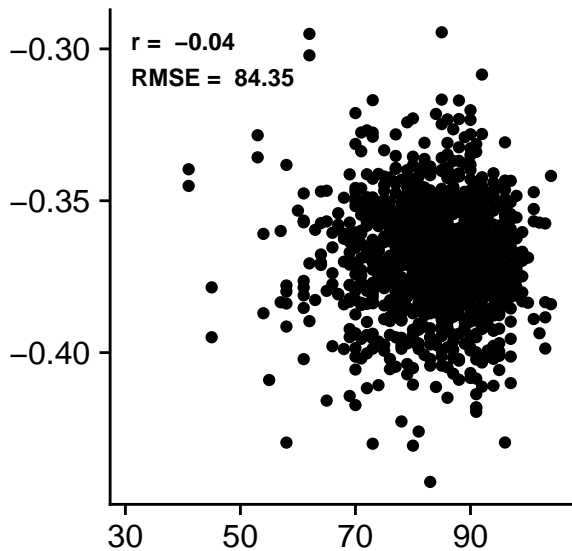**B MTC**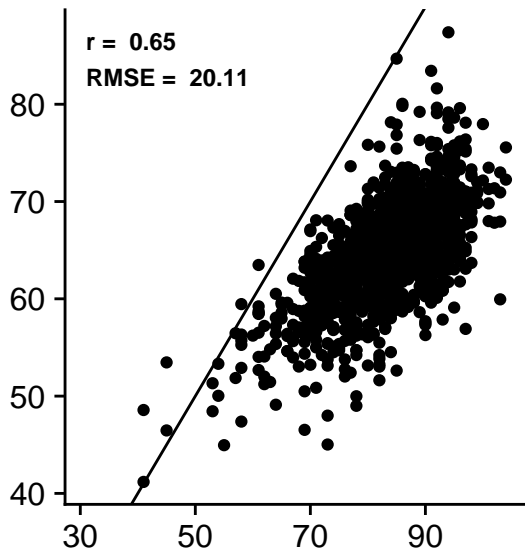**C GAC**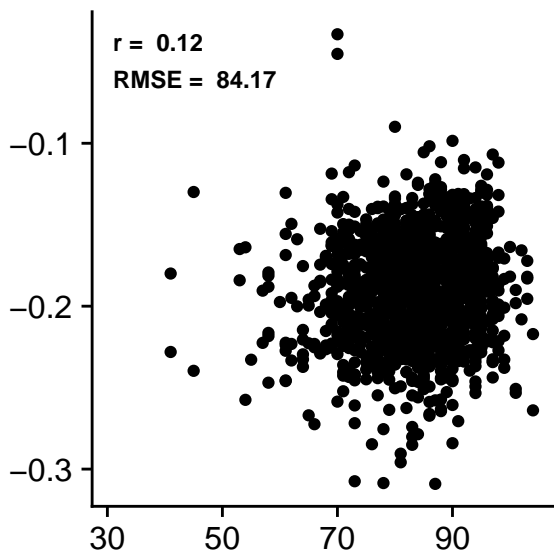**D CPC**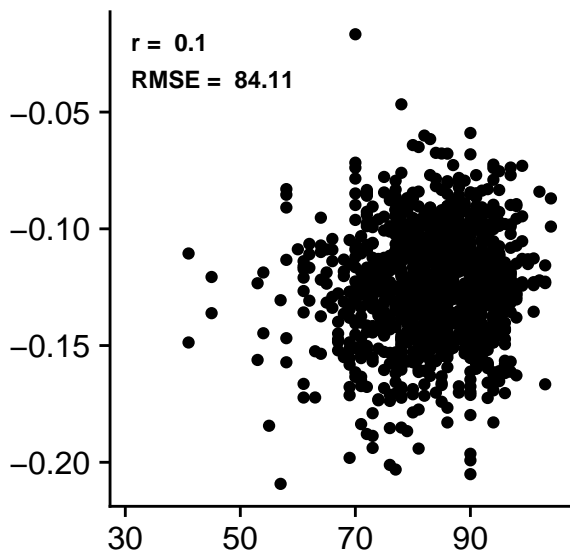**Predicted Age**  
*in years***Chronological Age**  
*in years*
